# Supplementary material for: MicroRNA Expression in Cutaneous Lupus: A New Window to Understand Its Pathogenesis
Source: Hindawi journal article supplement (doi:10.1155/2019/5049245), 2019-12-30
Supplement: f1 [file 5049245.f1.pdf]

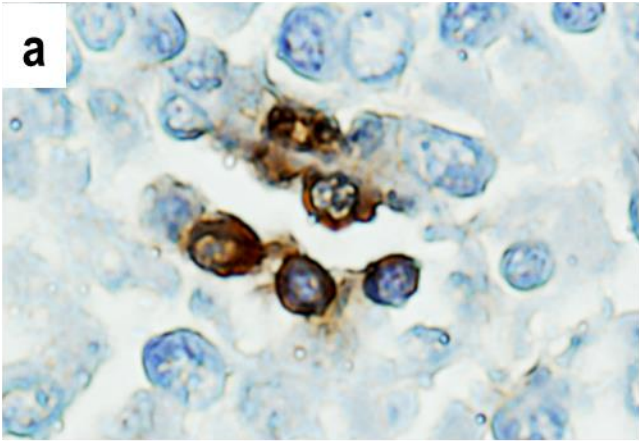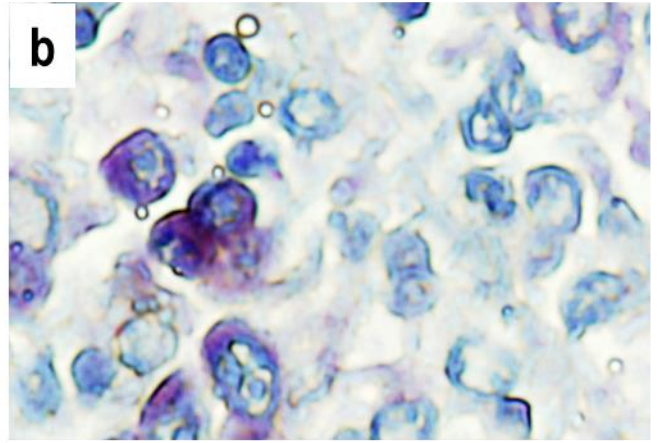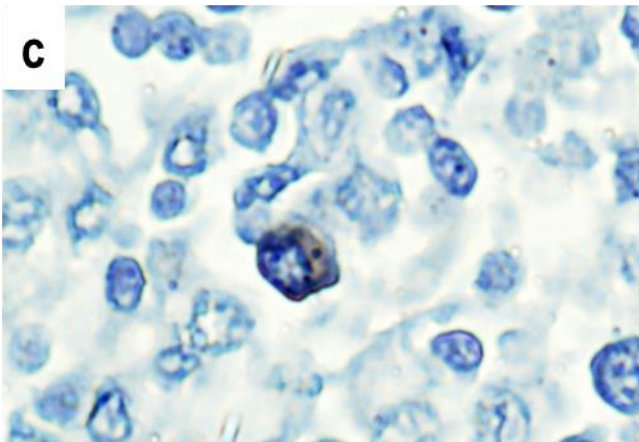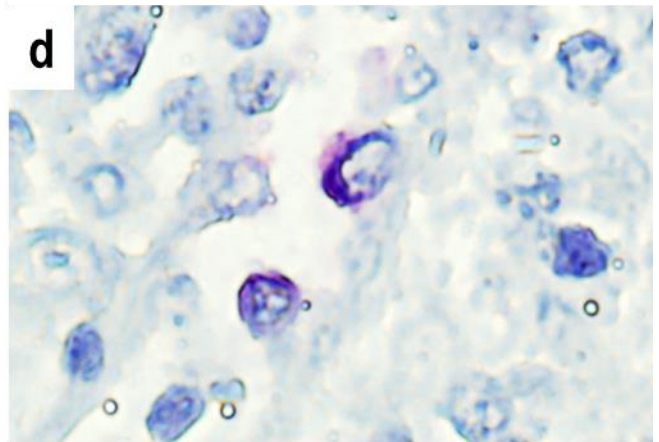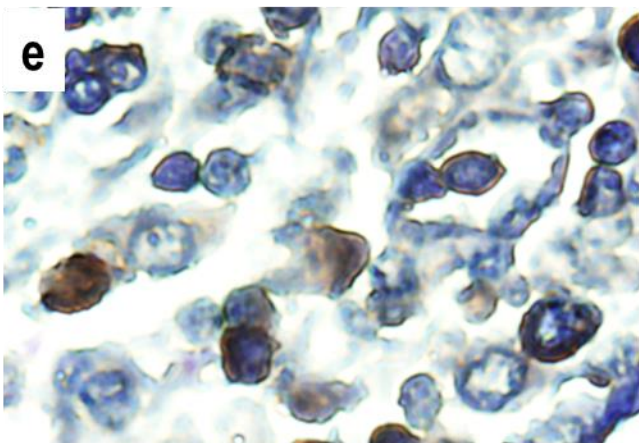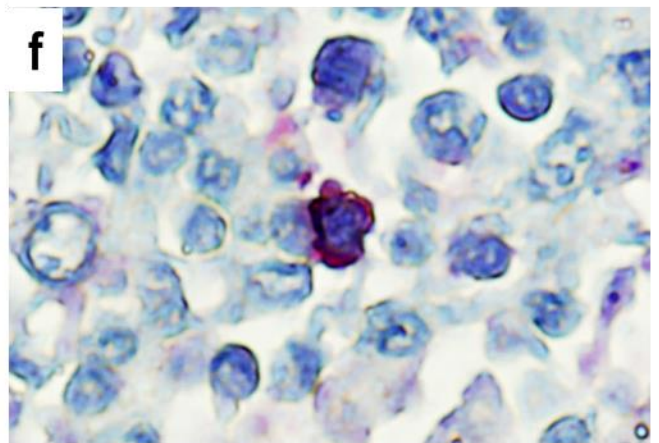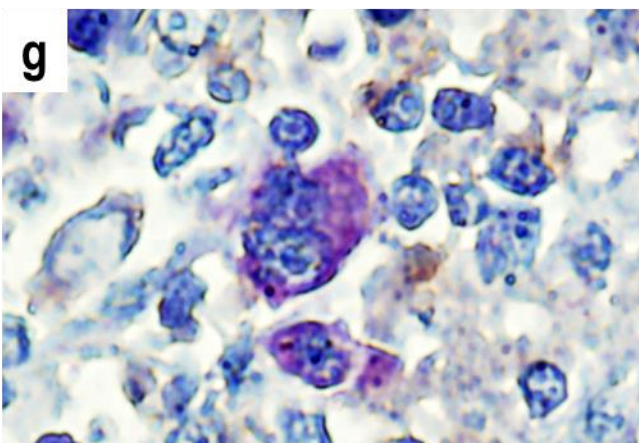

Supplementary Figure 1: Representative immunostaining of (a) IL-22-expressing cells, (b) IL-17A-expressing cells, (c) IL-4-expressing cells, (d) IFN- $\gamma$ - expressing cells, (e) Foxp3-expressing cells, (f) IL-10-expressing cells and (g) IDO-expressing cells in tissue biopsies from spleen. Original magnification was X600.

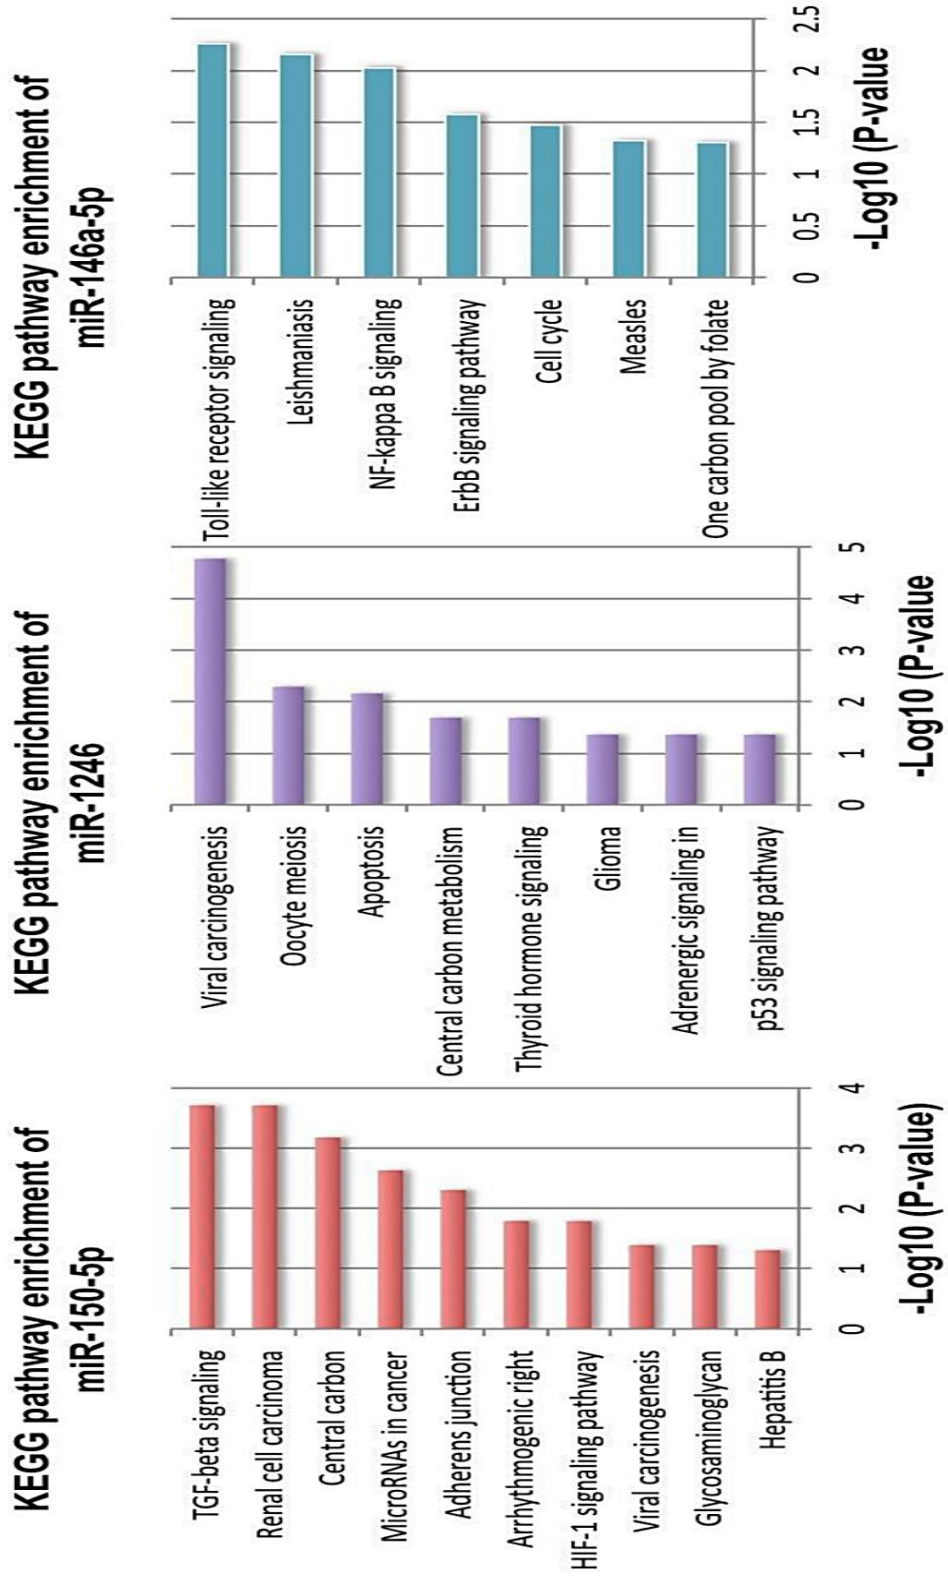

Supplementary Figure 2: Heatmap of KEGG pathways enriched with gene regulated by combination of hsa-miR-150-5p, hsa-miR-1246 and hsa-miR-146a-5p in patients with DLE.

**KEGG pathway enrichment of miR-23b-3p**

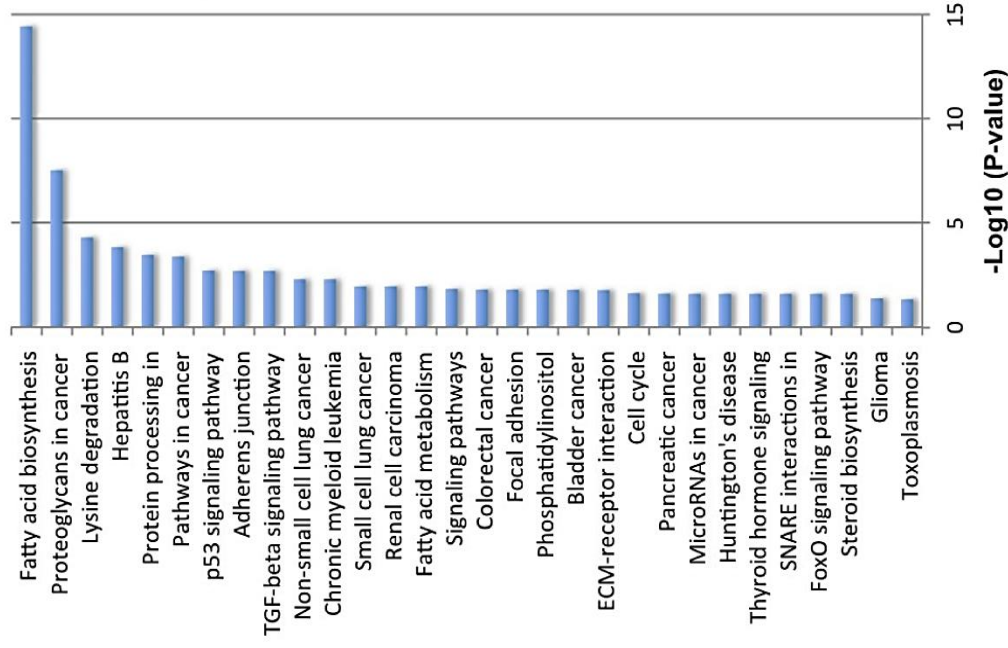

**KEGG pathway enrichment of miR-21-5p**

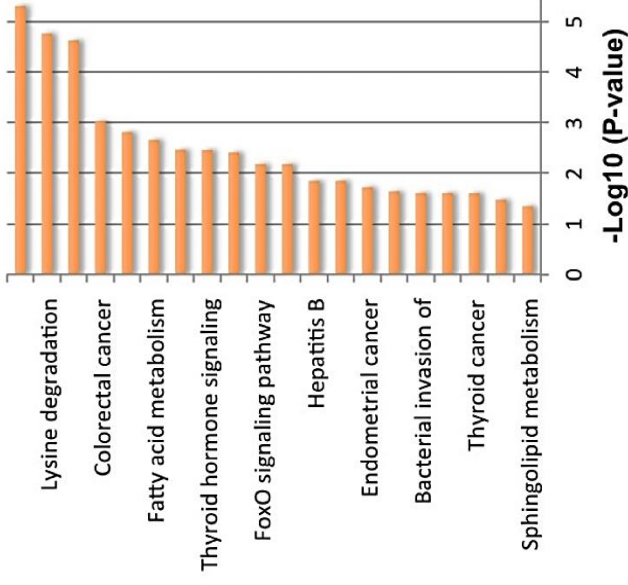

**KEGG pathway enrichment of miR-31-5p**

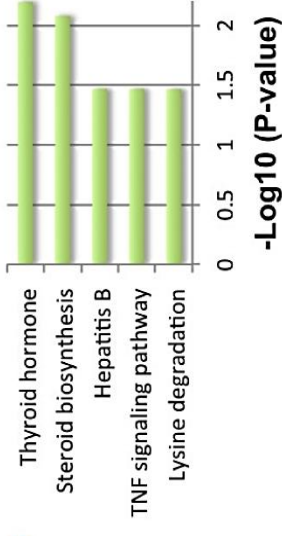

Supplementary Figure 3: Heatmap of KEGG pathways enriched with gene regulated by combination of hsa-miR-23b-3p, hsa-miR-21-5p and hsa-miR-31-5p in patients with SCLC.
